# Supplementary material for: Exposure to Traffic-Related Air Pollution in Relation to Progression in Physical Disability among Older Adults
Source: PubMed Central journal article supplement (PMC4937863; doi:10.1289/ehp.1510089), 2016-03-29
Supplement: ehp.1510089.s001.acco.pdf [file ehp.1510089.s001.acco.pdf]

**Note to readers with disabilities:** *EHP* strives to ensure that all journal content is accessible to all readers. However, some figures and Supplemental Material published in *EHP* articles may not conform to [508 standards](#) due to the complexity of the information being presented. If you need assistance accessing journal content, please contact [ehp508@niehs.nih.gov](mailto:ehp508@niehs.nih.gov). Our staff will work with you to assess and meet your accessibility needs within 3 working days.

## **Supplemental Material**

### **Exposure to Traffic-Related Air Pollution in Relation to Progression in Physical Disability among Older Adults**

Jennifer Weuve, Joel D. Kaufman, Adam A. Szpiro, Cynthia Curl, Robin C. Puett, Todd Beck,  
Denis A. Evans, and Carlos F. Mendes de Leon

#### **Table of Contents**

##### **Computation of area-level socioeconomic status**

**Table S1.** Adjusted differences (and 95% confidence interval [CI]) in 5-year change in physical performance by exposure to traffic-related air pollution: results from additional sensitivity analyses.

**Table S2.** Distribution of baseline residential distances to major road.

**Table S3.** Participant characteristics by category of distance to census class A3 road at baseline

**Figure S1.** Differences in baseline and 5-year change in physical performance score with higher long-term NO<sub>x</sub> exposure: results with and without multivariable adjustment and weighting.

**Figure S2.** Model-based estimated trajectory in physical performance, by quartile of long-term exposure to ambient oxides of nitrogen (NO<sub>x</sub>)

**Figure S3.** Adjusted difference (95% confidence interval [CI]) in baseline physical performance score, by residential distance to census feature class A3 road (N=9994)

### **Computation of area-level socioeconomic status.**

We obtained the following variables for each U.S. census block group located within the CHAP region: median household income; median home value; percentage of households with income from interest, dividends or rent; percentage of adults who completed college; and the percentage of employed persons 16 years of age or older in executive, managerial, or professional specialty occupations. Following a previously developed approach (Diez Roux et al. 2001), we computed a composite area-based SES score for each block group. This score was the average of the block group-specific *z*-scores of all of the components listed above. (In a departure from the previously developed score, our score did not include percentage of adults with a high school diploma, because, in the CHAP area, this variable was not distributed as expected across composite scores.) Higher scores reflected less socioeconomic disadvantage.

### **Reference**

Diez Roux AV, Merkin SS, Arnett D, Chambless L, Massing M, Nieto FJ, et al. 2001. Neighborhood of residence and incidence of coronary heart disease. *N Engl J Med* 345(2):99-106.

**Table S1. Adjusted<sup>a</sup> differences (and 95% confidence interval [CI]) in 5-year change in physical performance by exposure to traffic-related air pollution: results from additional sensitivity analyses.**

|                                                                                                                                      | Difference in 5-year change<br>in physical performance<br>score (95% CI) |
|--------------------------------------------------------------------------------------------------------------------------------------|--------------------------------------------------------------------------|
| <i>Quartile of long-term<sup>b</sup> NO<sub>x</sub> exposure (N=5708)</i>                                                            |                                                                          |
| Using truncated weights <sup>c</sup>                                                                                                 |                                                                          |
| Lowest (20.7-36.2 ppb)                                                                                                               | 0.00 <i>reference</i>                                                    |
| 2nd (36.3-39.6 ppb)                                                                                                                  | -0.63 (-1.12, -0.14)                                                     |
| 3rd (39.7-43.7 ppb)                                                                                                                  | -0.60 (-1.15, -0.05)                                                     |
| Highest (43.8-56.0 ppb)                                                                                                              | -1.01 (-1.60, -0.42)                                                     |
|                                                                                                                                      | $p_{trend}^d = 0.001$                                                    |
| Unweighted                                                                                                                           |                                                                          |
| Lowest (20.7-36.2 ppb)                                                                                                               | 0.00 <i>reference</i>                                                    |
| 2nd (36.3-39.6 ppb)                                                                                                                  | -0.54 (-0.88, -0.19)                                                     |
| 3rd (39.7-43.7 ppb)                                                                                                                  | -0.41 (-0.80, -0.01)                                                     |
| Highest (43.8-56.0 ppb)                                                                                                              | -0.57 (-1.00, -0.14)                                                     |
|                                                                                                                                      | $p_{trend}^d = 0.02$                                                     |
| <i>Residential distance to road (N=9994)</i>                                                                                         |                                                                          |
| Distance to nearest A3 road, alternative categories                                                                                  |                                                                          |
| ≥ 500 m                                                                                                                              | 0.00 <i>reference</i>                                                    |
| 250-499 m                                                                                                                            | 0.14 (-0.06, 0.34)                                                       |
| 100-249 m                                                                                                                            | -0.05 (-0.25, 0.15)                                                      |
| < 100 m                                                                                                                              | 0.03 (-0.19, 0.25)                                                       |
|                                                                                                                                      | $p_{trend}^d = 0.4$                                                      |
| Near busy road <sup>e</sup> , yes vs no                                                                                              | -0.03 (-0.19, 0.13)                                                      |
| <i>Residential distance to road restricted to participants in analyses of long-term<sup>b</sup> NO<sub>x</sub> exposure (N=5708)</i> |                                                                          |
| Residential distance to nearest A3 road <sup>f</sup>                                                                                 |                                                                          |
| ≥ 200 m                                                                                                                              | 0.00 <i>reference</i>                                                    |
| 100-199 m                                                                                                                            | -0.08 (-0.35, 0.19)                                                      |
| 50-99 m                                                                                                                              | -0.17 (-0.54, 0.20)                                                      |
| < 50 m                                                                                                                               | -0.42 (-0.81, -0.03)                                                     |
|                                                                                                                                      | $p_{trend}^d = 0.05$                                                     |

[a] Adjusted for age, sex, race, education, income, and smoking status.

[b] Predicted exposures averaged over 5 years.

[c] Extreme weights truncated to the lowest 0.5 percentile and highest 99.5 percentile.

[d] Trend p-values were computed from models containing a term that took on the median values of each category.

[e] < 100 m from truck route or A1 or A2 road, or < 50 m from A3 road.

[f] At the start of the 5-year NO<sub>x</sub> averaging interval (1999 for most participants).

---

**Table S2. Distribution of baseline residential distances to major road.**

|                                                                                     | <b>Number</b> | <b>Percentage</b> |
|-------------------------------------------------------------------------------------|---------------|-------------------|
| <i>Distance to Class A1 road</i>                                                    |               |                   |
| Closer than 50 m                                                                    | 58            | 0.6%              |
| 50 m - 99 m                                                                         | 196           | 2%                |
| 100 m - 199 m                                                                       | 492           | 5%                |
| 200 m or farther                                                                    | 9248          | 93%               |
| <i>Distance to Class A2 road</i>                                                    |               |                   |
| Closer than 50 m                                                                    | 97            | 1%                |
| 50 m - 99 m                                                                         | 356           | 4%                |
| 100 m - 199 m                                                                       | 794           | 8%                |
| 200 m or farther                                                                    | 8747          | 88%               |
| <i>Distance to Class A3 road</i>                                                    |               |                   |
| Closer than 50 m                                                                    | 938           | 9%                |
| 50 m - 99 m                                                                         | 1091          | 11%               |
| 100 m - 199 m                                                                       | 2553          | 26%               |
| 200 m or farther                                                                    | 5412          | 54%               |
| <i>Distance to truck route</i>                                                      |               |                   |
| Closer than 50 m                                                                    | 50            | 0.5%              |
| 50 m - 99 m                                                                         | 163           | 2%                |
| 100 m - 199 m                                                                       | 496           | 5%                |
| 200 m or farther                                                                    | 9285          | 93%               |
| <i>Minimum distance to Class A1 or A2 road</i>                                      |               |                   |
| Closer than 50 m                                                                    | 155           | 2%                |
| 50 m - 99 m                                                                         | 537           | 5%                |
| 100 m - 199 m                                                                       | 1203          | 12%               |
| 200 m or farther                                                                    | 8099          | 81%               |
| <i>Near busy road (&lt; 100 m from A1, A2 or truck route; or &lt; 50 m from A3)</i> |               |                   |
| No                                                                                  | 8414          | 84%               |
| Yes                                                                                 | 1580          | 16%               |

---

**Table S3. Participant<sup>a</sup> characteristics<sup>b</sup> by category of distance to census class A3 road at baseline.**

|                                                         | Overall <sup>c</sup> | Residential distance to class A3 road |            |            |                     | P value  |
|---------------------------------------------------------|----------------------|---------------------------------------|------------|------------|---------------------|----------|
|                                                         |                      | Closer than<br>50 m                   | 50-99 m    | 100-199 m  | 200 m or<br>farther |          |
|                                                         | N=9994               | N=938                                 | N=1091     | N=2553     | N=5412              |          |
| Age, years; mean (sd)                                   | 74.1 (7.1)           | 74.1 (7.0)                            | 73.7 (6.8) | 75.0 (7.8) | 73.7 (6.8)          | < 0.0001 |
| Male, %                                                 | 3885 (39)            | 34                                    | 38         | 38         | 40                  | 0.005    |
| African American, %                                     | 6296 (63)            | 73                                    | 70         | 61         | 61                  | < 0.0001 |
| Education, years; mean (sd)                             | 12.3 (3.5)           | 11.5 (3.5)                            | 11.9 (3.4) | 12.2 (3.4) | 12.6 (3.5)          | < 0.0001 |
| Household income, % <sup>d</sup>                        |                      |                                       |            |            |                     |          |
| < \$15,000                                              | 2809 (28)            | 36                                    | 31         | 29         | 26                  |          |
| \$15,000-\$29,999                                       | 3471 (35)            | 38                                    | 37         | 35         | 34                  |          |
| > \$30,000                                              | 3266 (33)            | 22                                    | 28         | 31         | 36                  | < 0.0001 |
| Missing                                                 | 448 (4)              | 4                                     | 4          | 5          | 4                   |          |
| Self-rated health, % <sup>d,e</sup>                     |                      |                                       |            |            |                     |          |
| Excellent                                               | 2217 (22)            | 20                                    | 21         | 20         | 24                  |          |
| Good                                                    | 4715 (47)            | 46                                    | 45         | 49         | 47                  |          |
| Fair                                                    | 2509 (25)            | 27                                    | 29         | 25         | 24                  | < 0.0001 |
| Poor                                                    | 542 (5)              | 8                                     | 5          | 6          | 5                   |          |
| Global cognitive score, standard units; mean (sd)       | 0.2 (0.8)            | 0.1 (0.8)                             | 0.1 (0.8)  | 0.1 (0.8)  | 0.3 (0.8)           | 0.0002   |
| Social network score, median (iqr) <sup>e</sup>         | 6 (7)                | 6 (7)                                 | 6 (7)      | 5 (6)      | 6 (7)               | < 0.0001 |
| Walks > 3 h per week, % <sup>e</sup>                    | 2243 (23)            | 19                                    | 22         | 23         | 23                  | 0.09     |
| Smoking status, % <sup>d</sup>                          |                      |                                       |            |            |                     |          |
| Never                                                   | 4596 (46)            | 46                                    | 46         | 48         | 45                  |          |
| Former                                                  | 4027 (40)            | 39                                    | 38         | 38         | 42                  | 0.007    |
| Current                                                 | 1371 (14)            | 15                                    | 16         | 13         | 13                  |          |
| Alcohol intake, % <sup>d,e</sup>                        |                      |                                       |            |            |                     |          |
| None                                                    | 6844 (69)            | 74                                    | 71         | 70         | 66                  |          |
| Moderate                                                | 2464 (25)            | 20                                    | 22         | 24         | 26                  | < 0.0001 |
| Heavy                                                   | 671 (7)              | 6                                     | 6          | 6          | 7                   |          |
| Systolic blood pressure, mm Hg; mean (sd) <sup>e</sup>  | 137 (20)             | 137 (20)                              | 138 (21)   | 137 (20)   | 138 (20)            | 0.7      |
| Diastolic blood pressure, mm Hg; mean (sd) <sup>e</sup> | 78 (12)              | 78 (12)                               | 79 (12)    | 78 (11)    | 78 (11)             | 0.07     |
| <i>Self-reported history of:</i>                        |                      |                                       |            |            |                     |          |
| Hypertension, % <sup>e</sup>                            | 5482 (55)            | 54                                    | 58         | 55         | 55                  | 0.3      |
| Cardiovascular disease, % <sup>e</sup>                  | 1420 (14)            | 15                                    | 15         | 14         | 14                  | 0.7      |
| Stroke, % <sup>e</sup>                                  | 997 (10)             | 12                                    | 9          | 10         | 9                   | 0.05     |
| Cancer, % <sup>e</sup>                                  | 1972 (20)            | 18                                    | 21         | 20         | 20                  | 0.3      |
| Moved over the course of follow-up, %                   | 20                   | 25                                    | 20         | 20         | 20                  | 0.002    |
| Physical performance score: mean (sd)                   | 9.8 (3.9)            | 9.2 (4.0)                             | 9.7 (3.8)  | 9.5 (4.0)  | 10.0 (3.9)          | < 0.0001 |

[a] Among participants included in the analyses of distance to road and physical performance, among whom baseline was defined as the first physical performance assessment on or after study enrollment (1993-2008).

[b] Unless specified, all characteristics reflect baseline values, i.e., the values at the first physical performance assessment on or after study enrollment (1993-2008).

[c] Where percentages are listed in the "Overall" column, counts are also provided [n (%)].

[d] Some columns do not sum to 100 percent due to rounding.

[e] Data on self-rated health, social network score, walking, alcohol intake, blood pressure, and self-reported history of the four chronic conditions were missing for a small percentage of participants (<4%). Values shown reflect non-missing responses. Data on these characteristics were not used in the association models.

**Figure S1. Differences in baseline and 5-year change in physical performance score with higher long-term<sup>a</sup> NO<sub>x</sub> exposure: results with and without multivariable adjustment<sup>b</sup> and weighting<sup>c</sup>.**

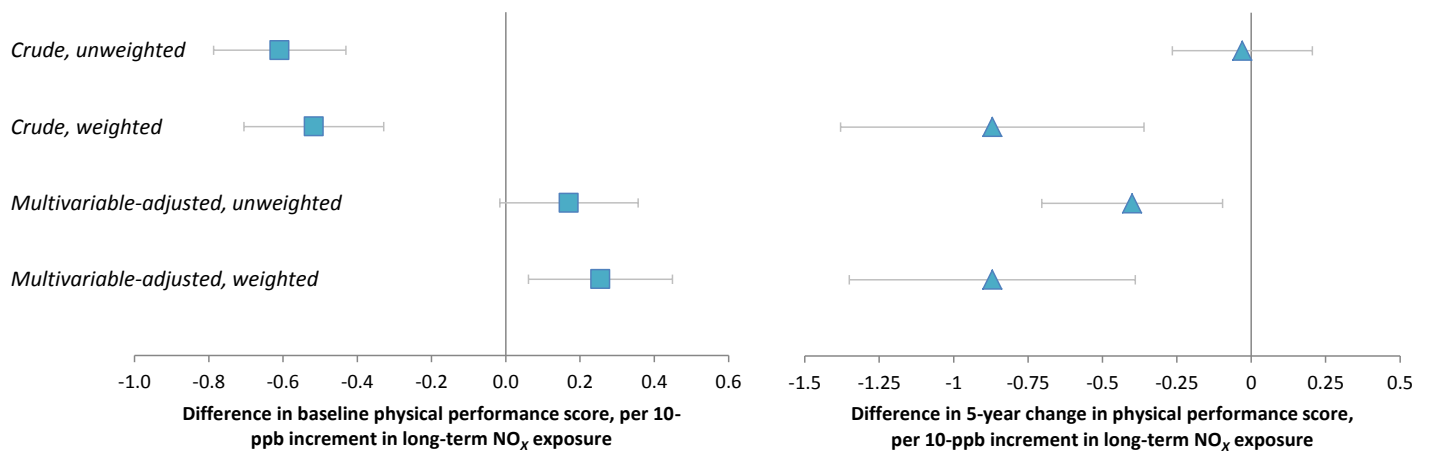

[a] Predicted exposures averaged over 5 years, unless another interval is specified.

[b] Adjusted, via independent terms in the regression models, for age, sex, race, education, income, and smoking status.

[c] Application of inverse probability-of-continuation weights.

**Figure S2. Model-based estimated trajectory in physical performance<sup>a</sup>, by quartile of long-term<sup>b</sup> exposure to ambient oxides of nitrogen (NO<sub>x</sub>).**

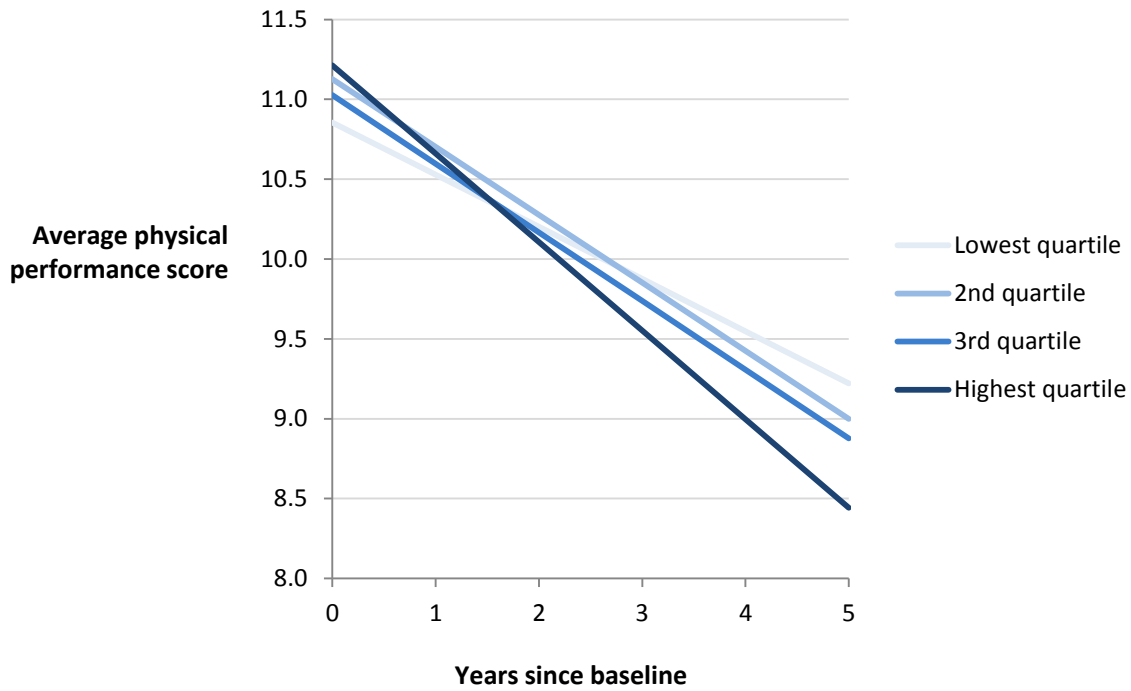

[a] Estimated physical performance score based on weighted generalized estimating equations regression model. The model was adjusted for age, sex, race, education, income, and smoking status.  
[b] Predicted exposures averaged over 5 years prior to baseline physical performance.

**Figure S3. Adjusted<sup>a</sup> difference (95% confidence interval [CI]) in baseline physical performance score, by residential distance to census feature class A3 road (N=9994).**

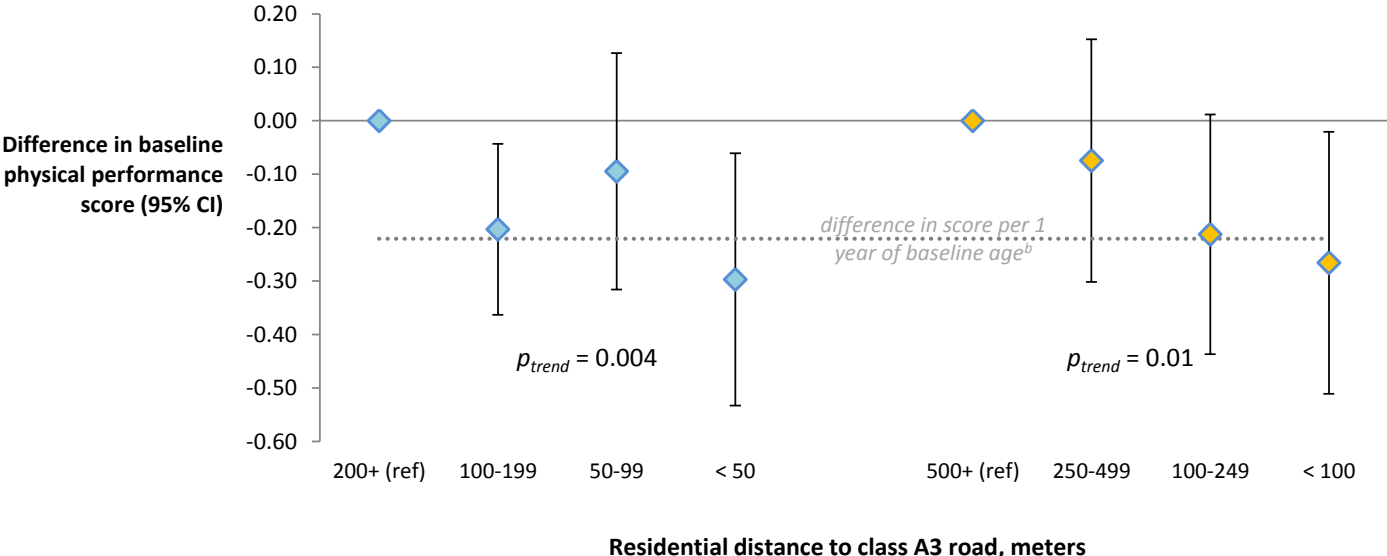

[a] Adjusted for age, sex, race, education, income, and smoking status. [b] For context on magnitude of the differences, the difference per one-year older age at baseline was -0.22 units in physical performance score.
